# Supplementary material for: Stereoselective synthesis of (2S,3R)- and (2R,3S)-iodoreboxetine; potential SPECT imaging agents for the noradrenaline transporter
Source: Royal Society of Chemistry journal article supplement (doi:10.1039/b802819b), 2008-01-01

**Supporting Information for:**

**Stereoselective synthesis of (2*S*,3*R*)- and (2*R*,3*S*)-iodoreboxetine; potential SPECT imaging agents for the noradrenaline transporter**

Nicola K. Jobson,<sup>a</sup> Rosemary Spike,<sup>b</sup> Andrew R. Crawford,<sup>b</sup> Deborah Dewar,<sup>b</sup>  
Sally L. Pimlott<sup>c</sup> and Andrew Sutherland<sup>a\*</sup>

*<sup>a</sup>WestChem, Department of Chemistry, The Joseph Black Building, University of Glasgow, Glasgow, UK G12 8QQ. <sup>b</sup>Division of Clinical Neuroscience, Faculty of Medicine, University of Glasgow, UK G12 8QQ. <sup>c</sup>West of Scotland Radionuclide Dispensary, University of Glasgow and North Glasgow University Hospital NHS Trust, Glasgow G11 6NT, UK. Email: andrews@chem.gla.ac.uk; Fax: 0141 330 4888; Tel: 0141 330 5936*

**Table of Contents**

|                                                                                                                                                    |        |
|----------------------------------------------------------------------------------------------------------------------------------------------------|--------|
| 1. <sup>1</sup> H NMR and <sup>13</sup> C NMR spectra of compounds <b>7</b> , <b>6</b> , <b>12</b> , <b>13</b> , <b>5</b> , <b>14</b> and <b>3</b> | S2-S15 |
|----------------------------------------------------------------------------------------------------------------------------------------------------|--------|

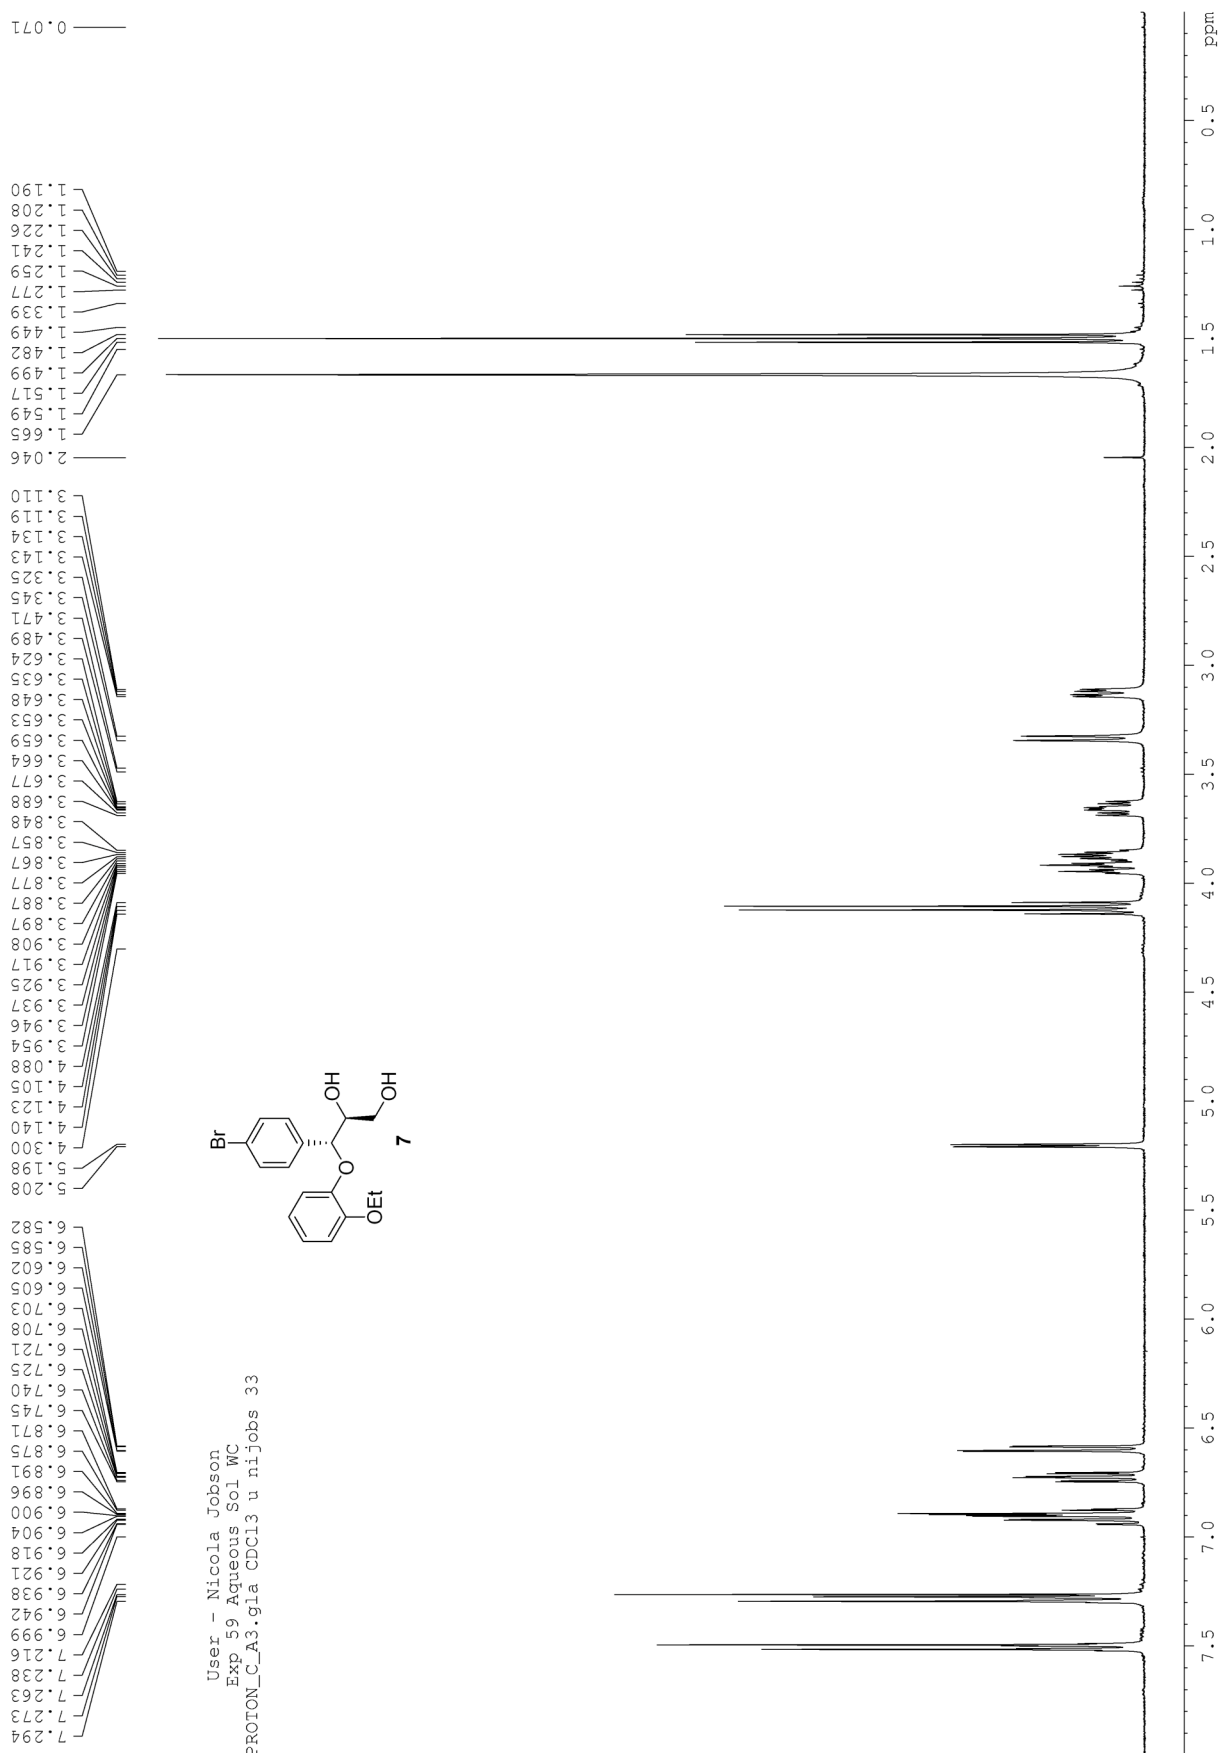

User - Nicola Jobson  
Exp 59 Aqueous Sol WC  
PROTON\_C\_A3.gla CDCl<sub>3</sub> u nijobs 33

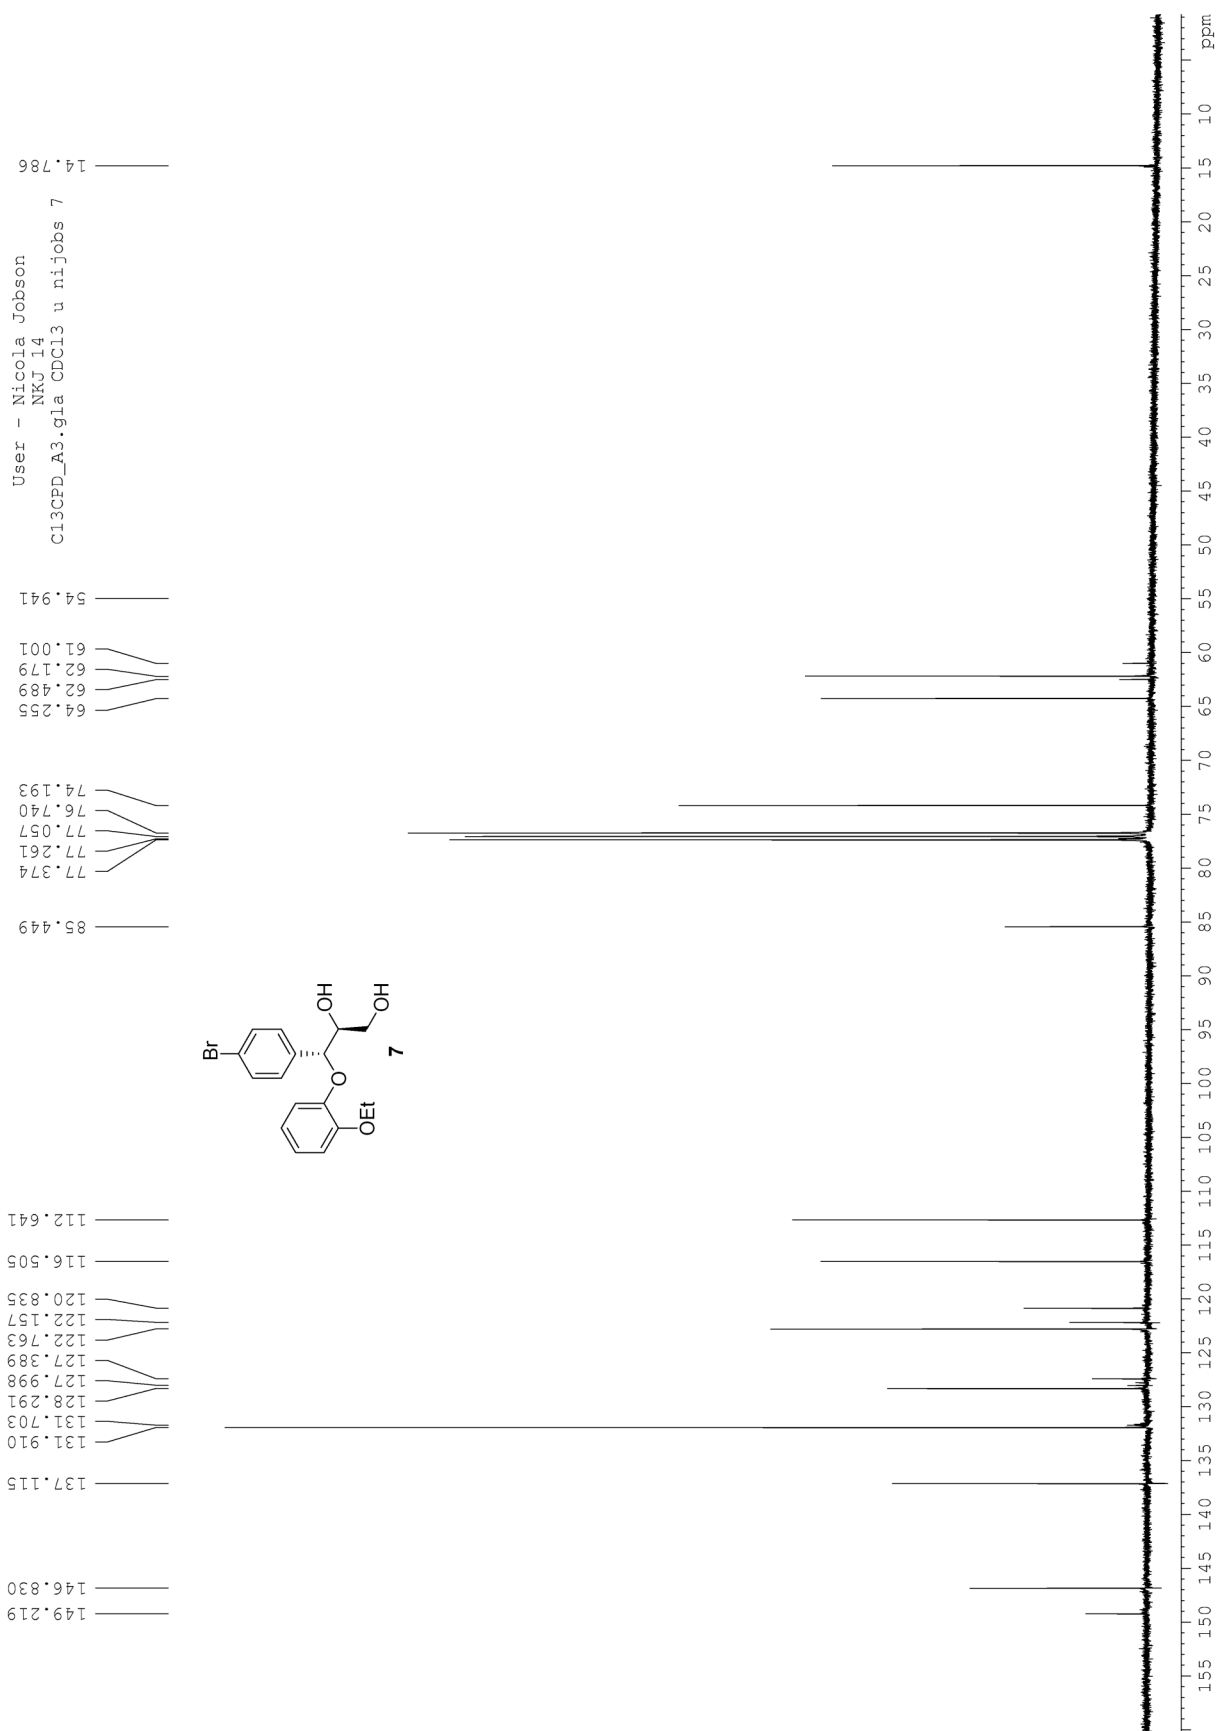

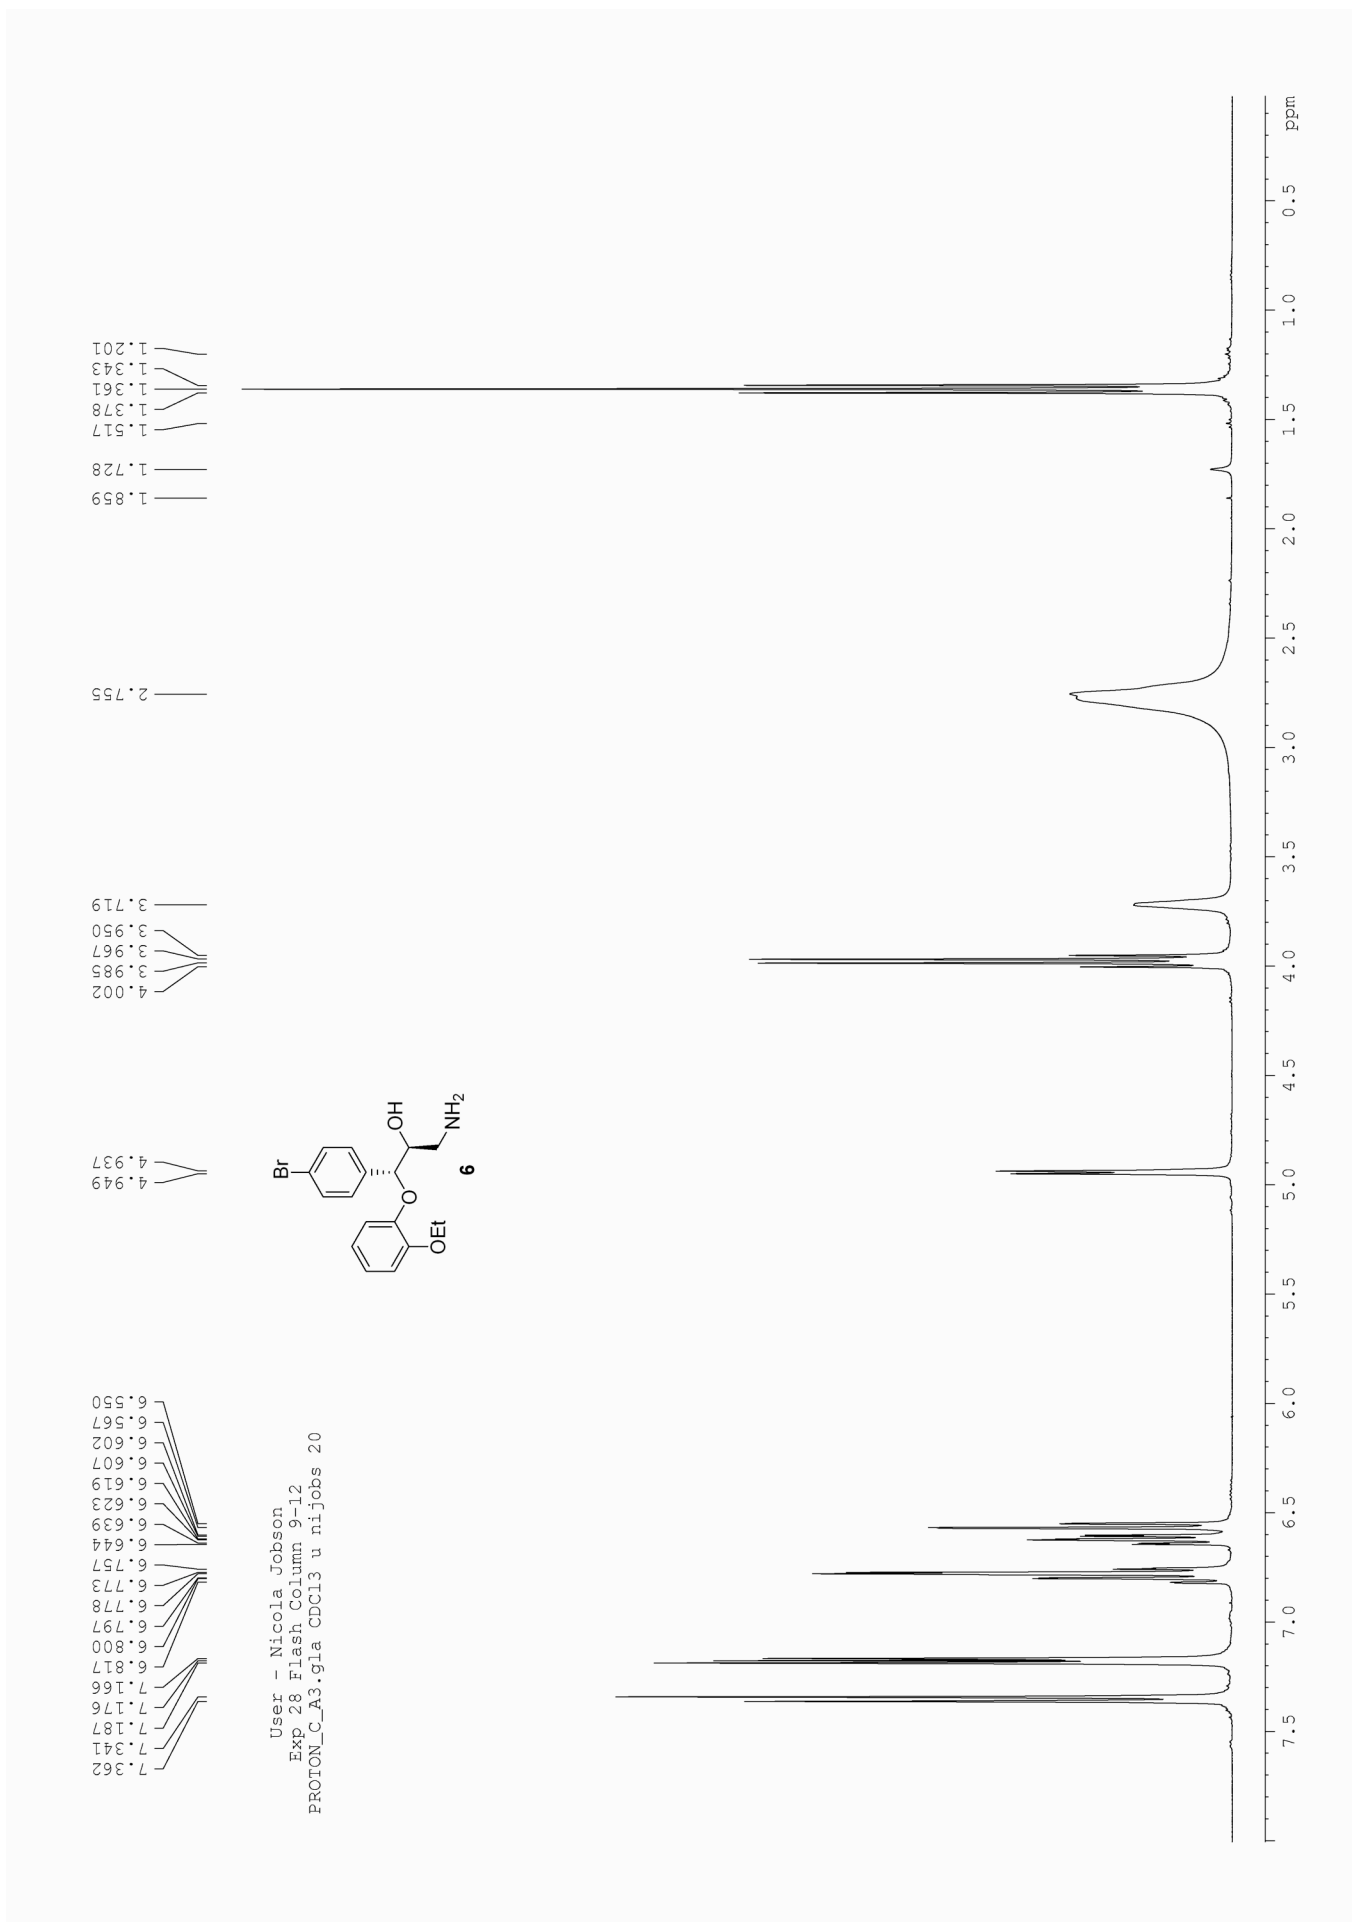

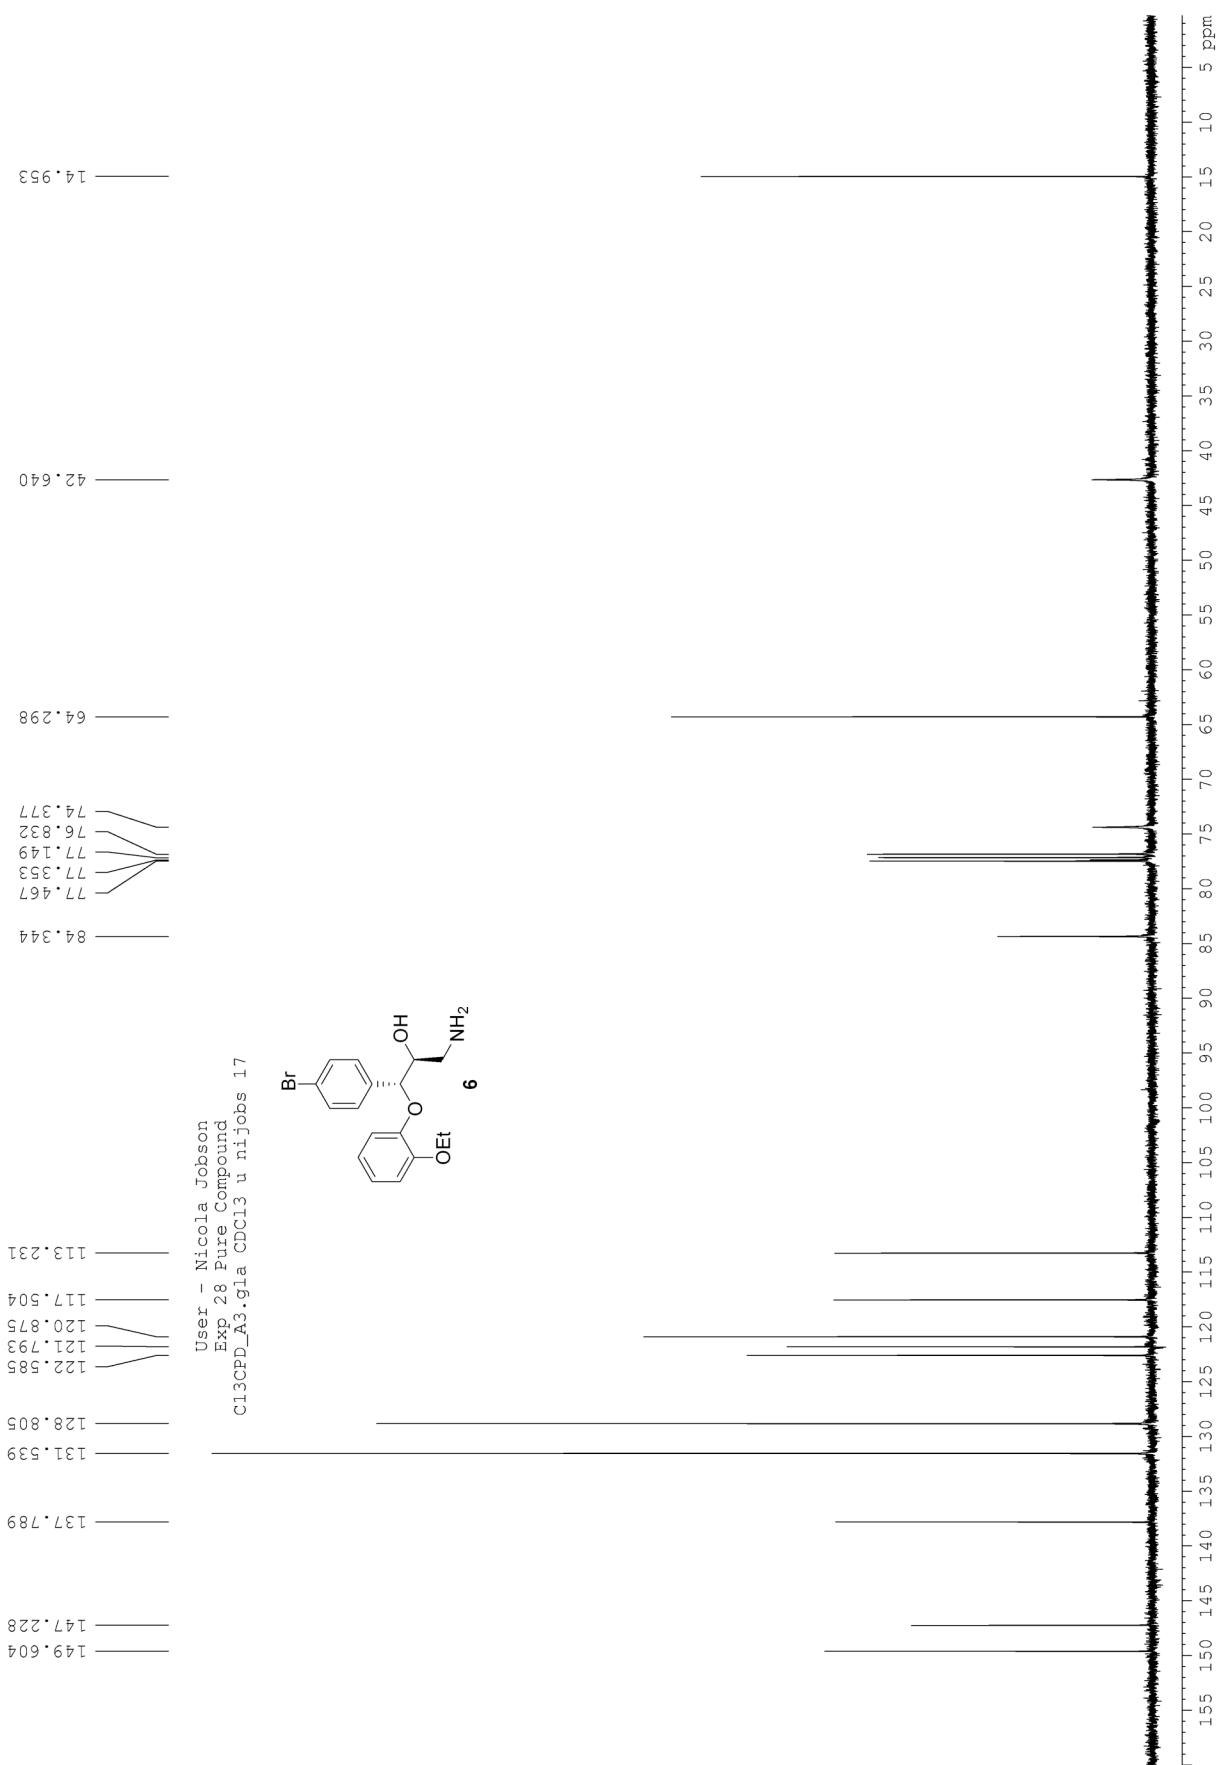

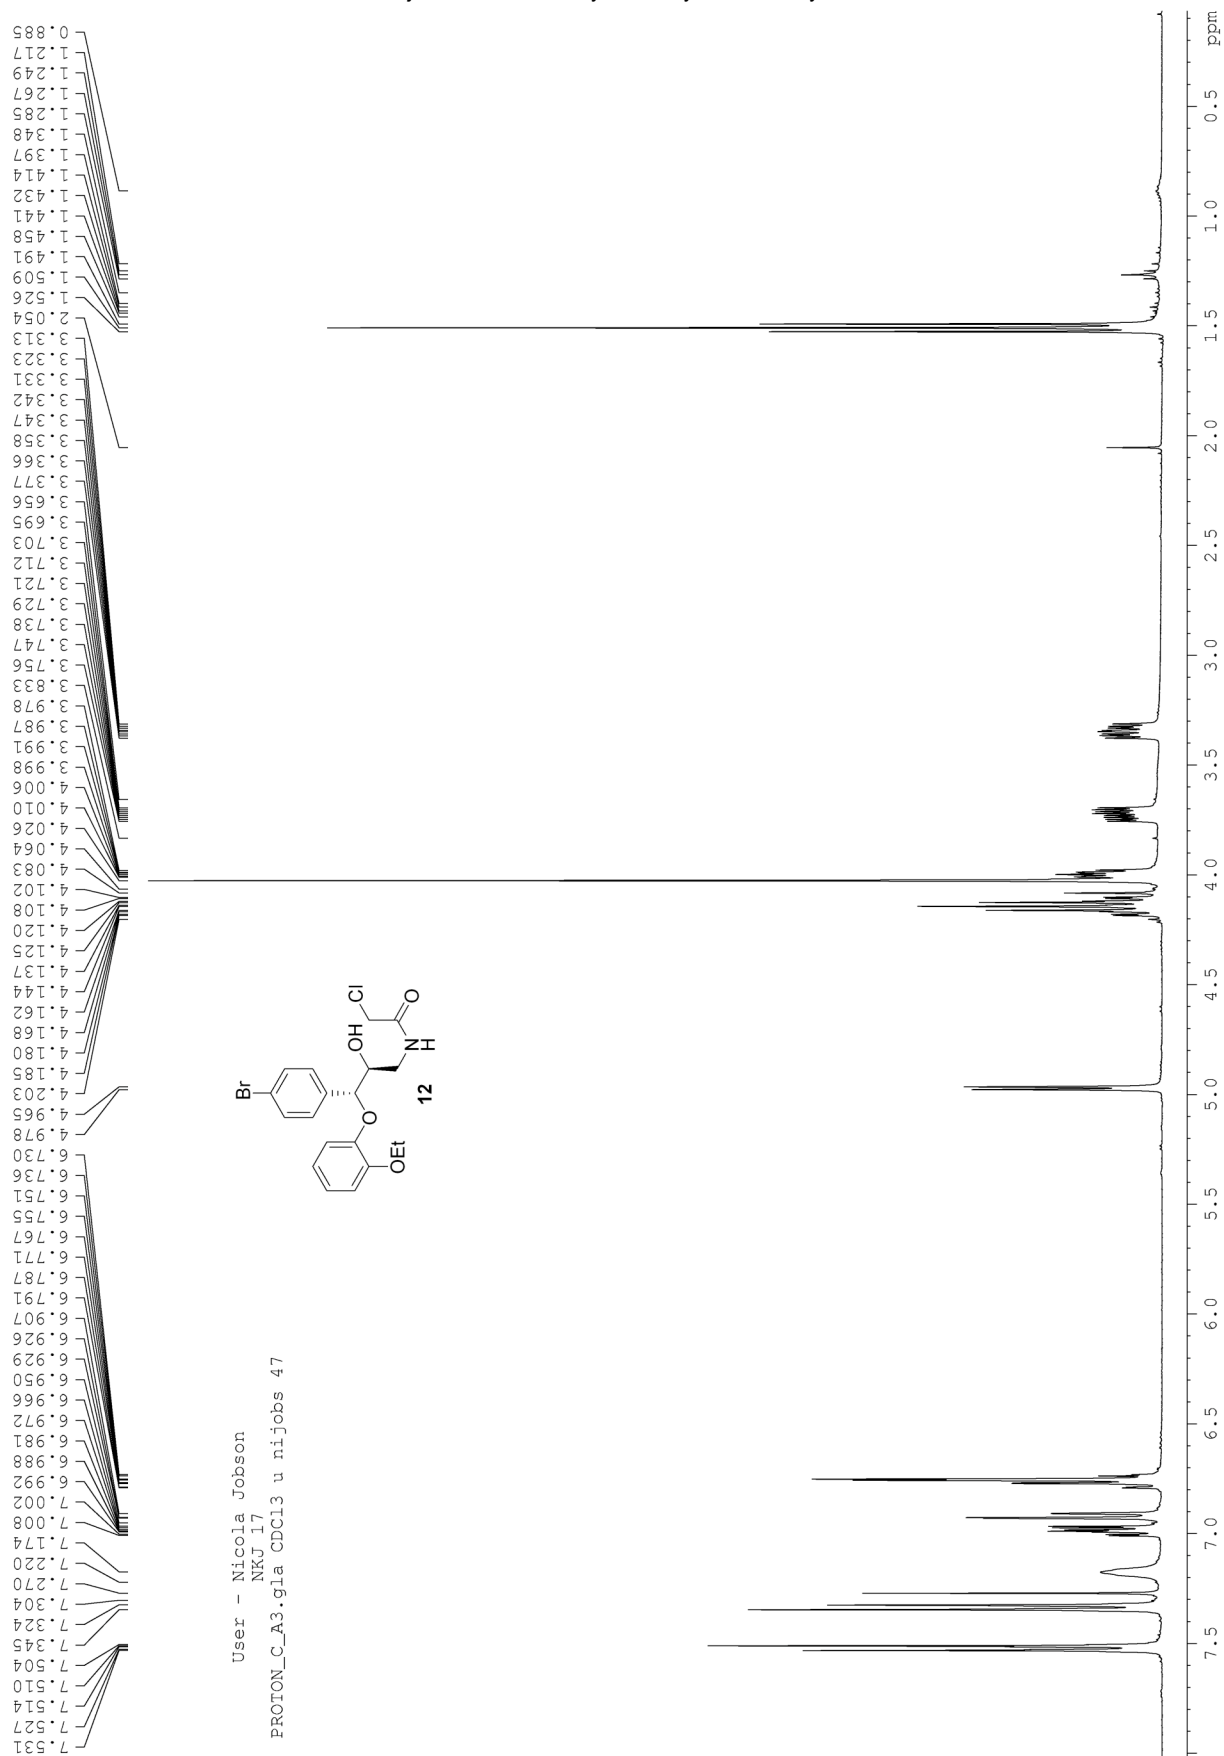

User - Nicola Jobson  
NKJ 17  
PROTON\_C\_A3.gla CDCl3 u ni.jobs 47

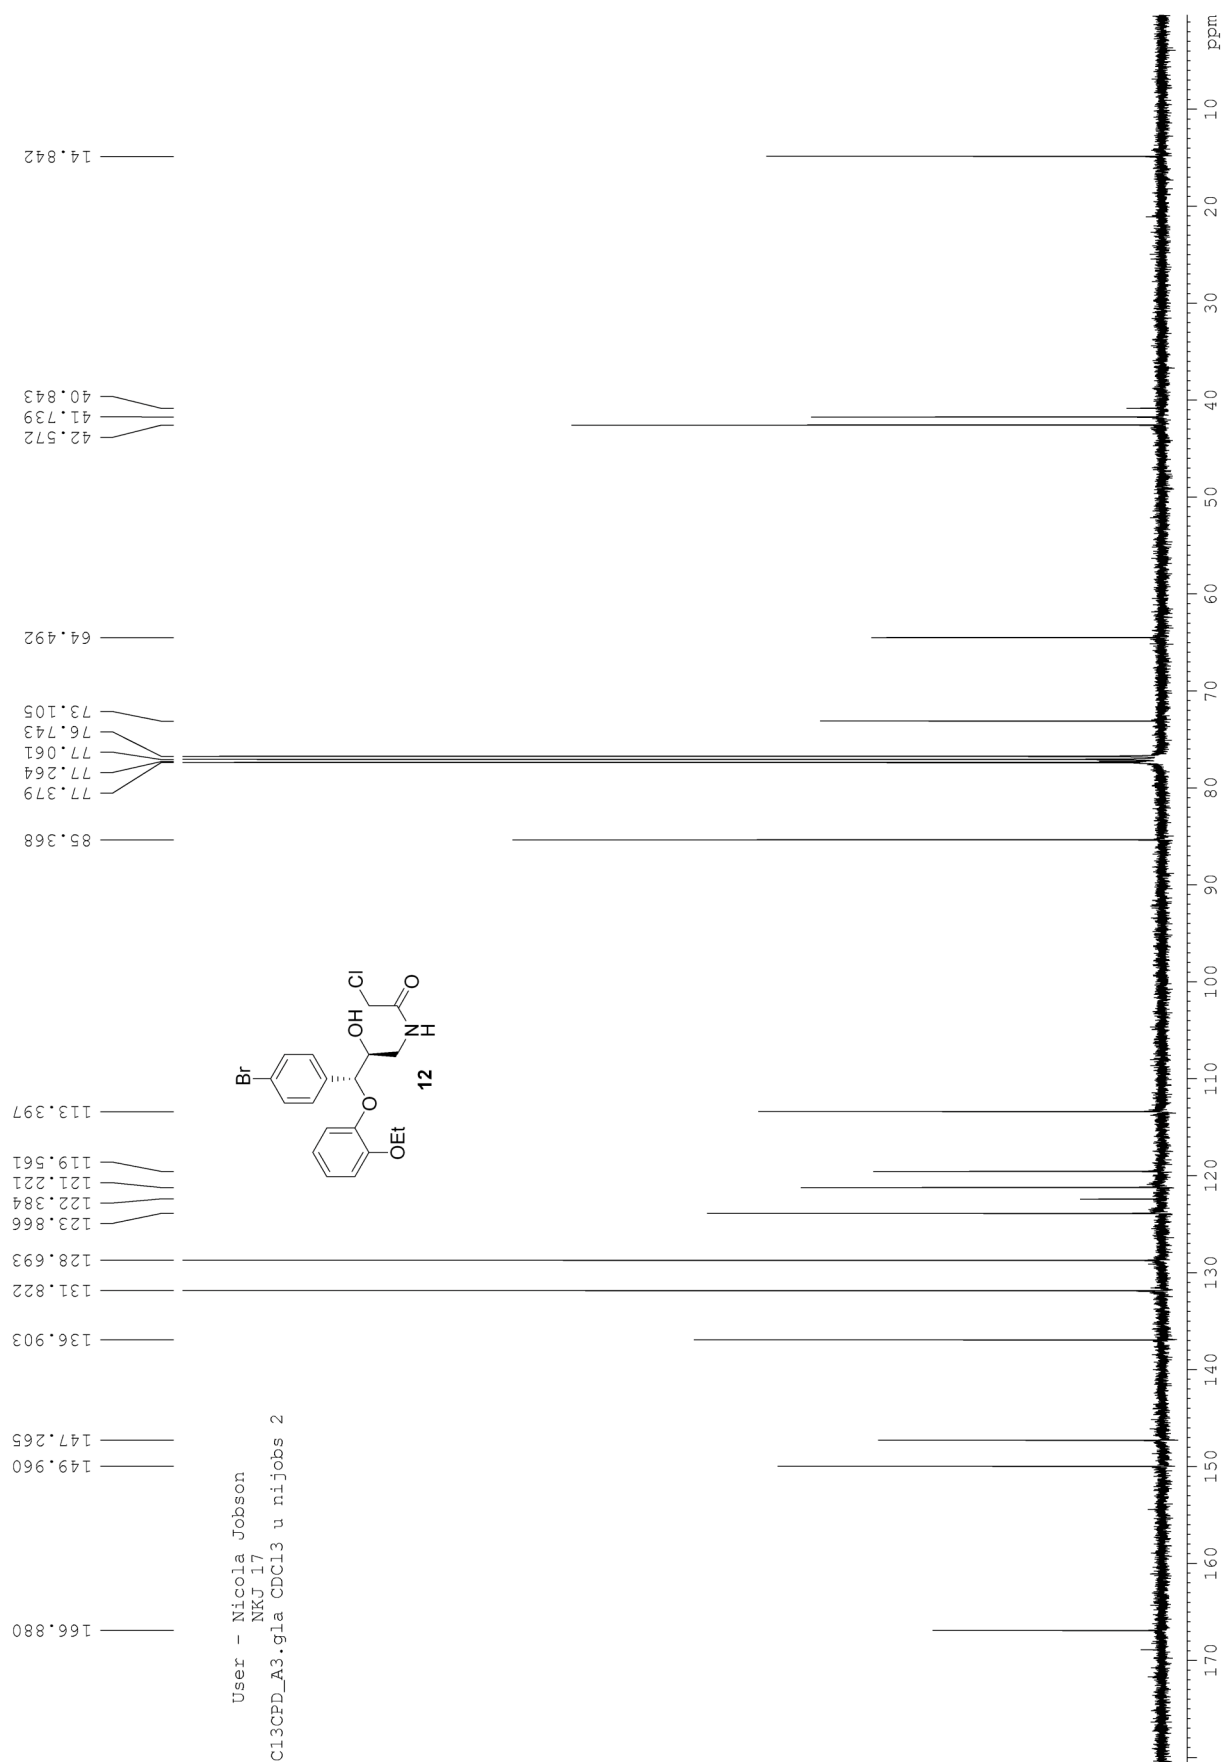

User - Nicola Jobson  
NKJ 17  
CI3CPD\_A3.gla CDCl3 u nijobs 2

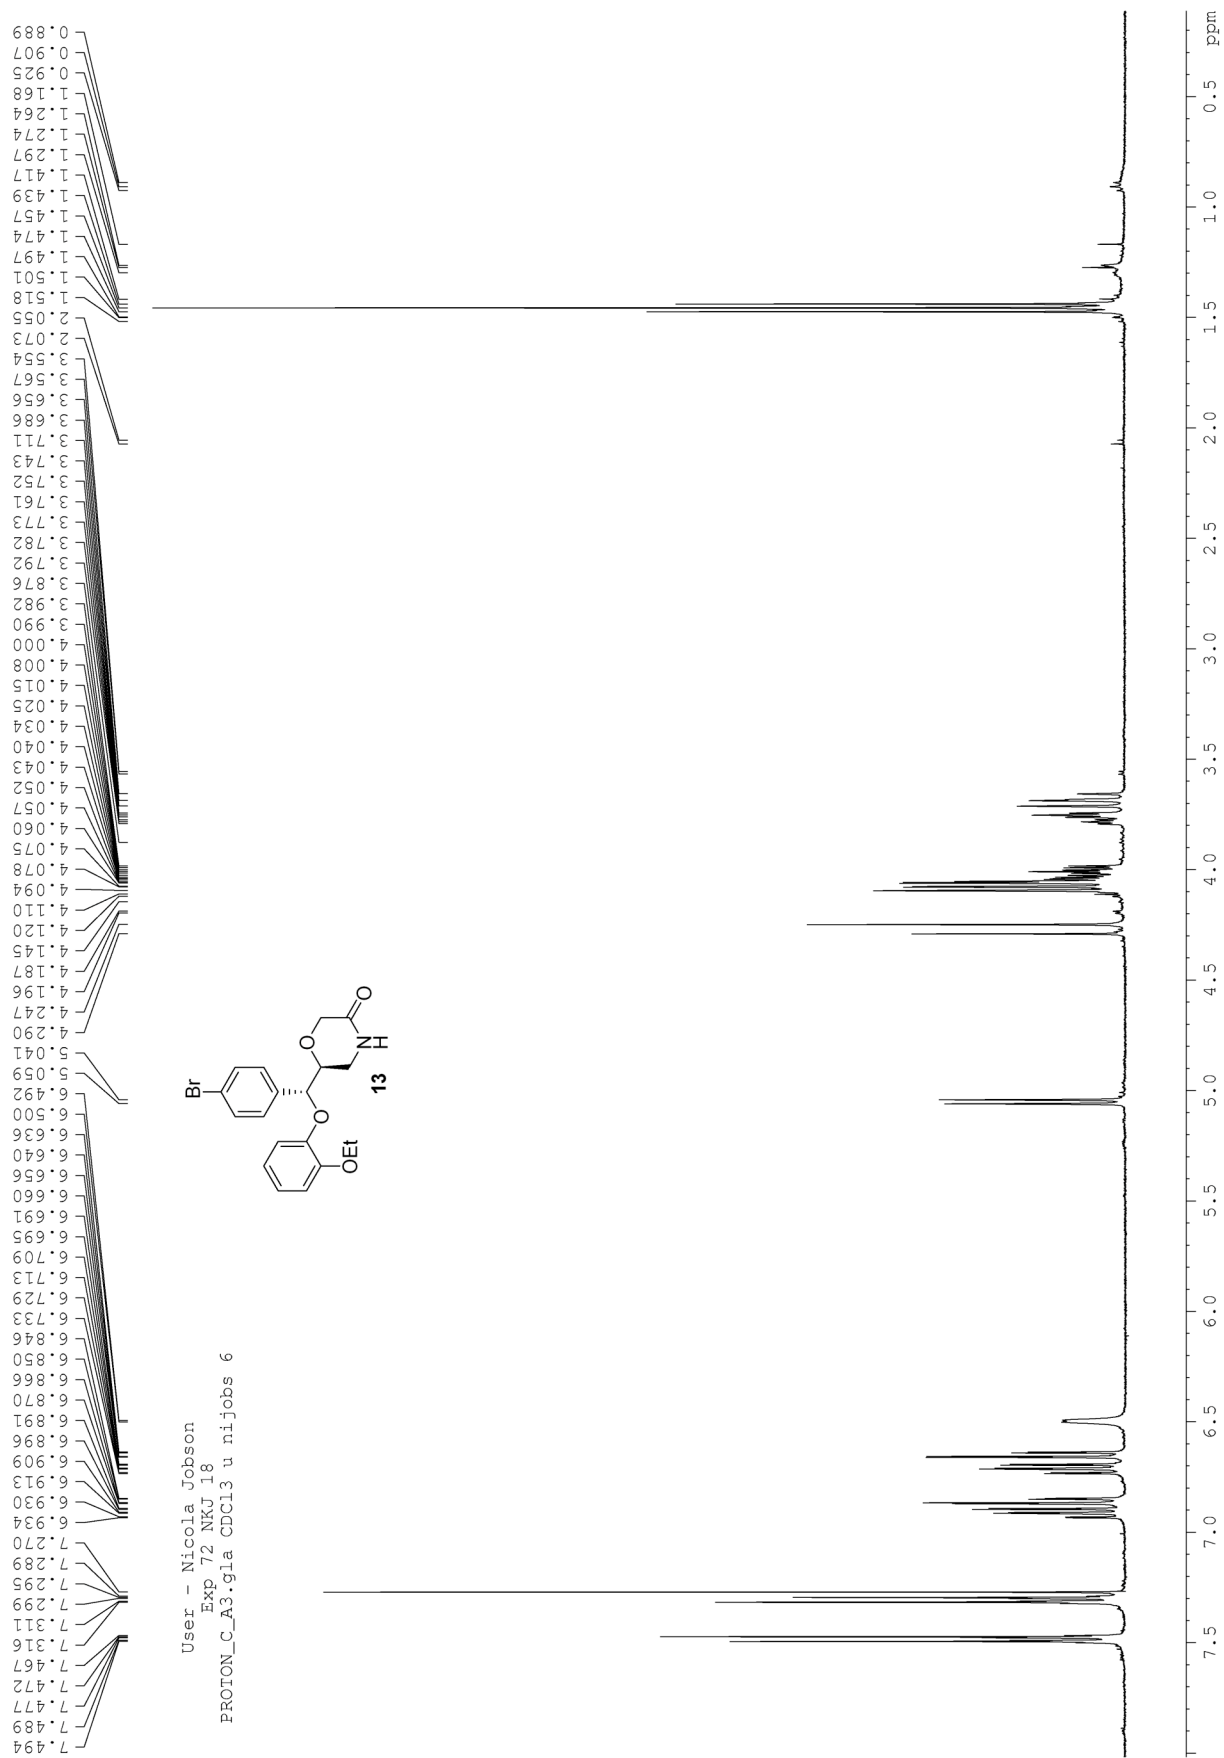



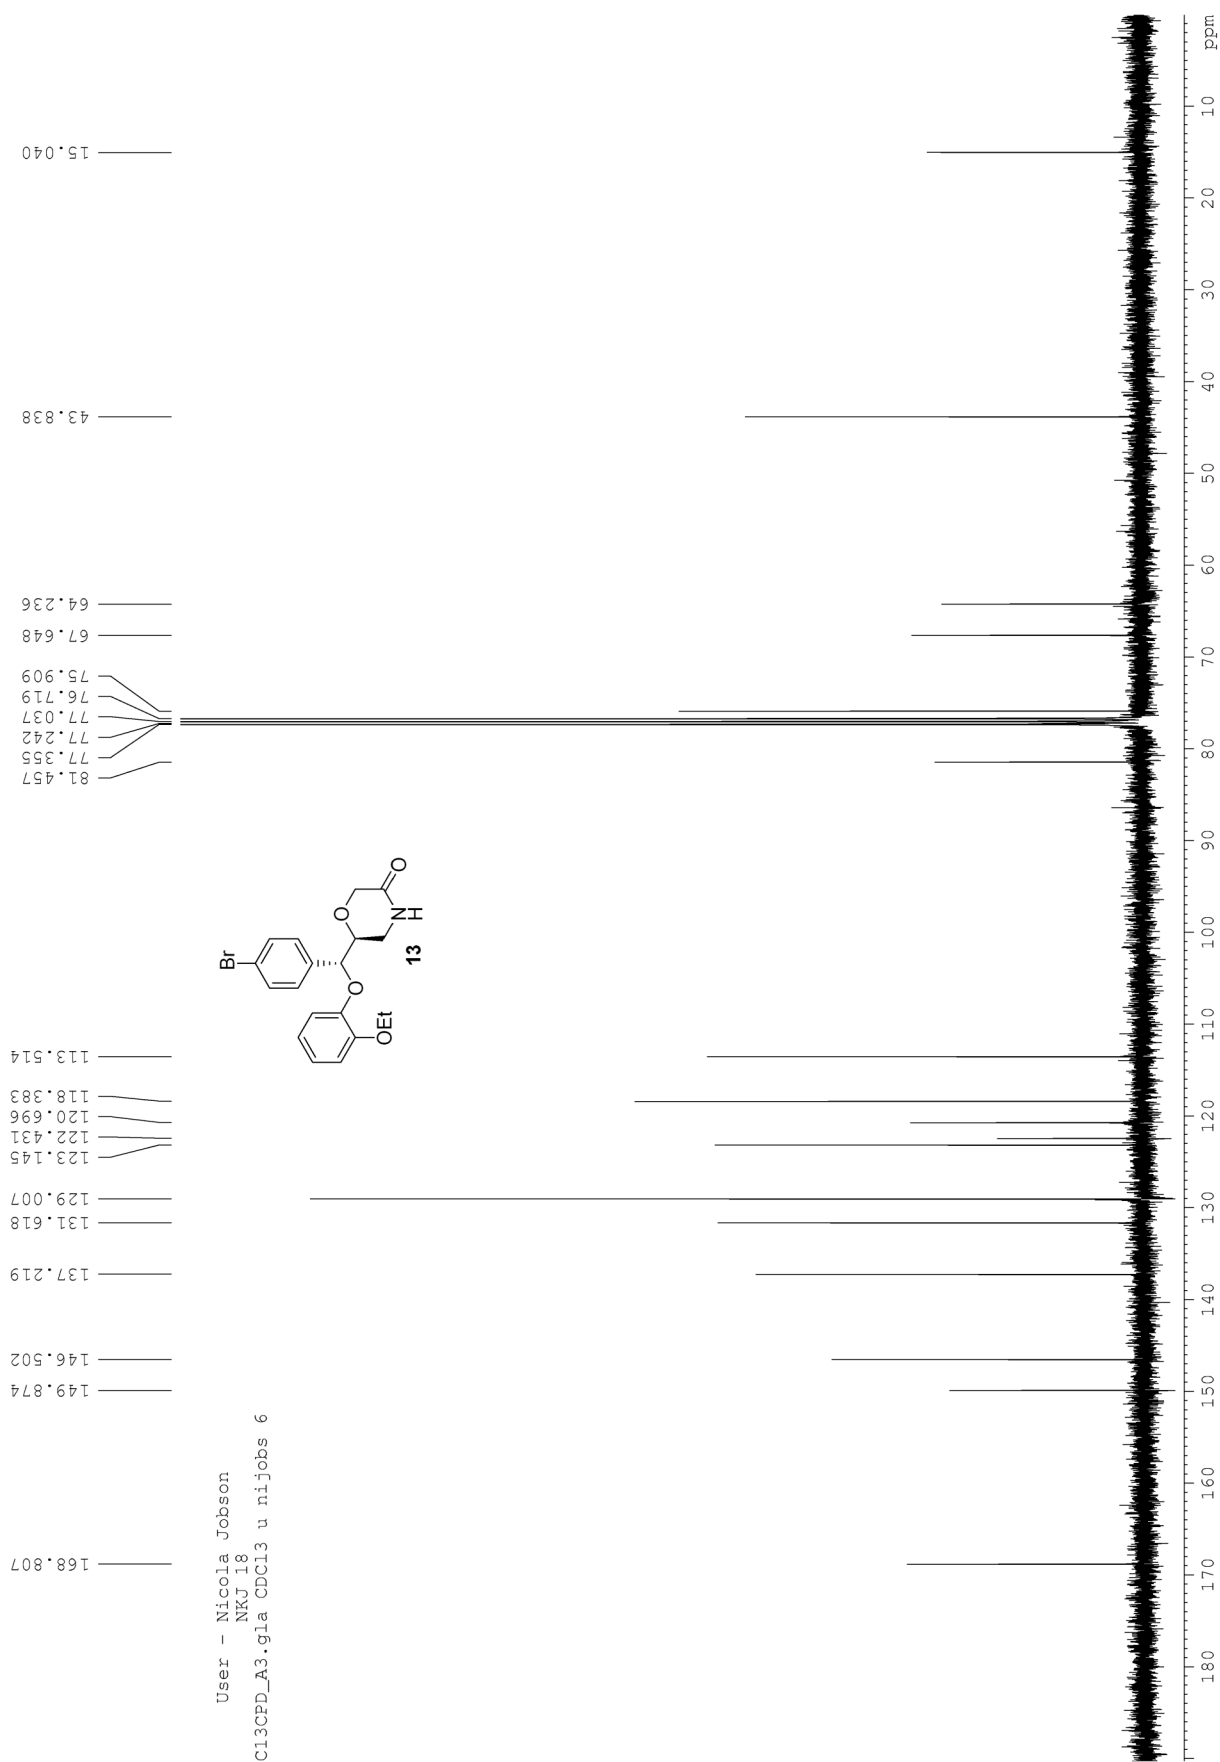

User - Nicola Jobson  
NKJ 18  
C13CPD\_A3.gla CDC13 u ni1jobs 6

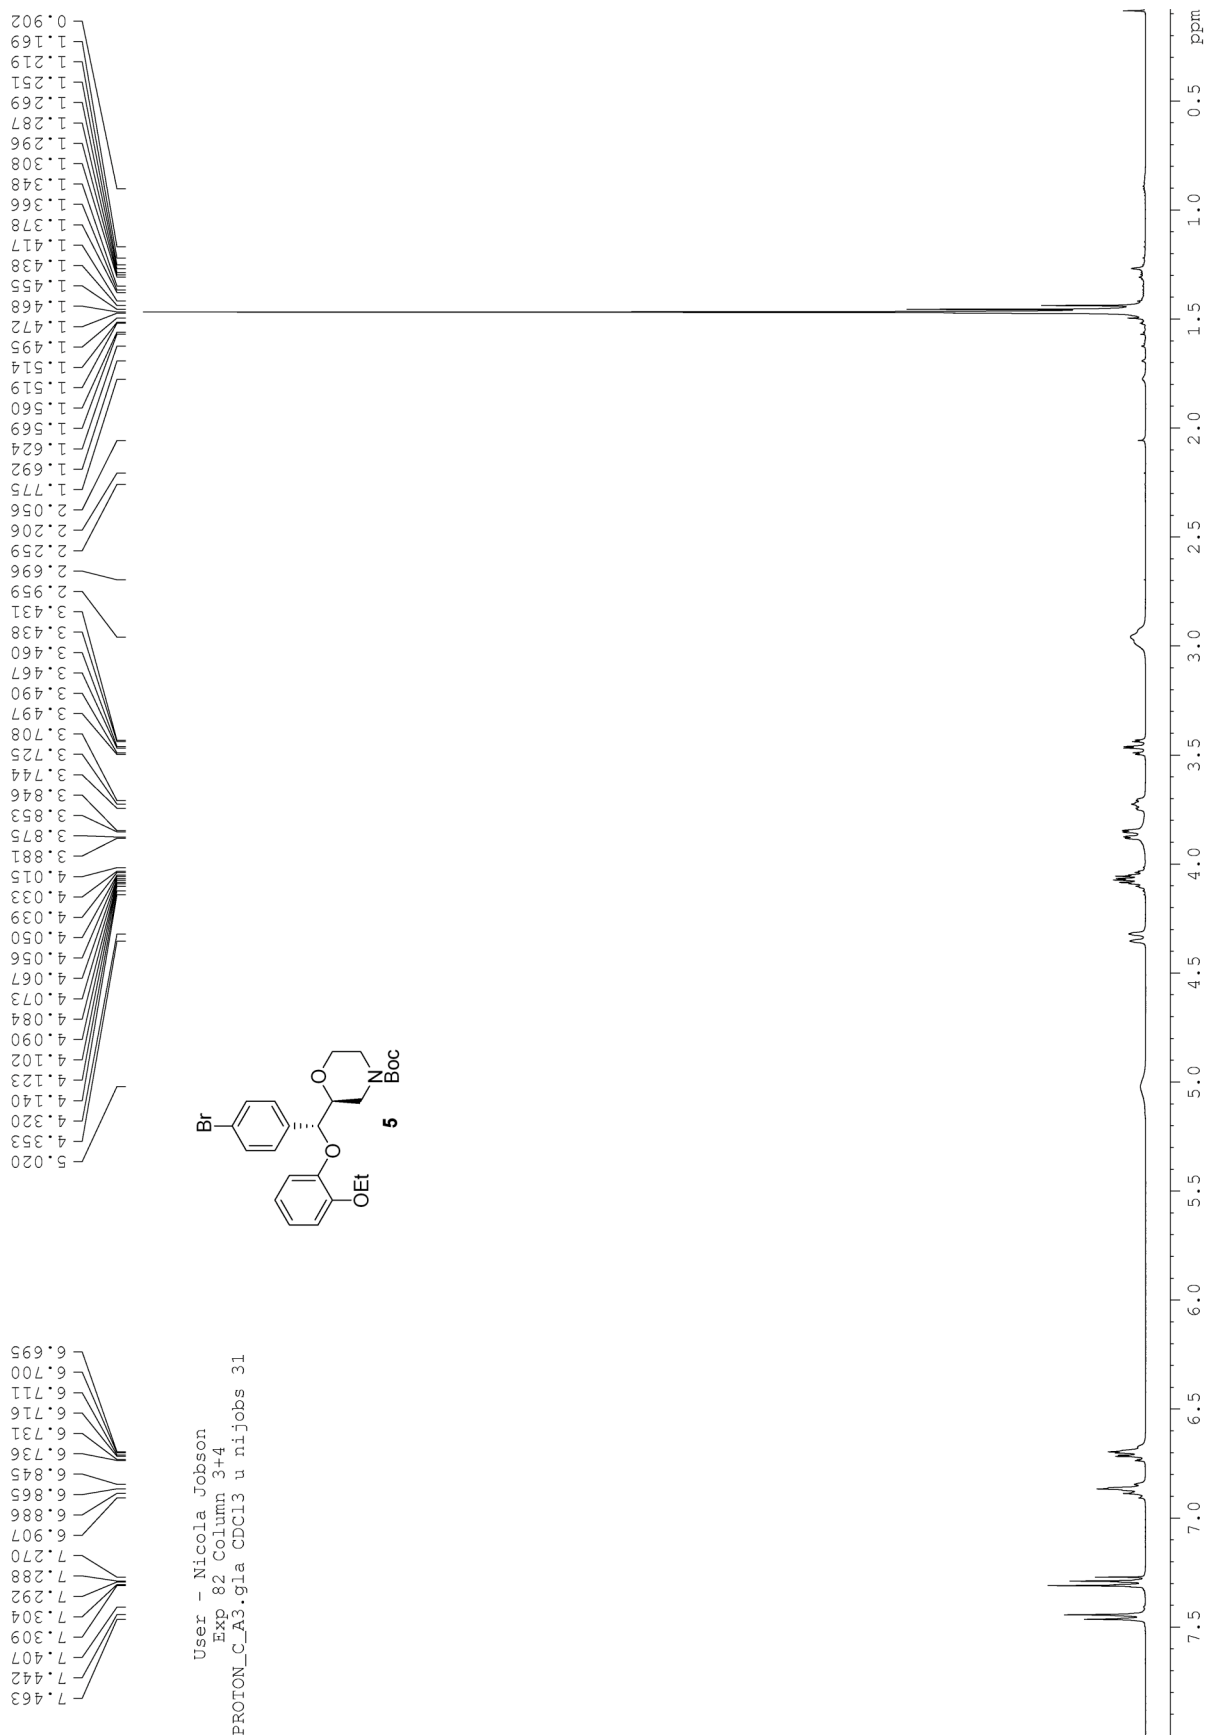

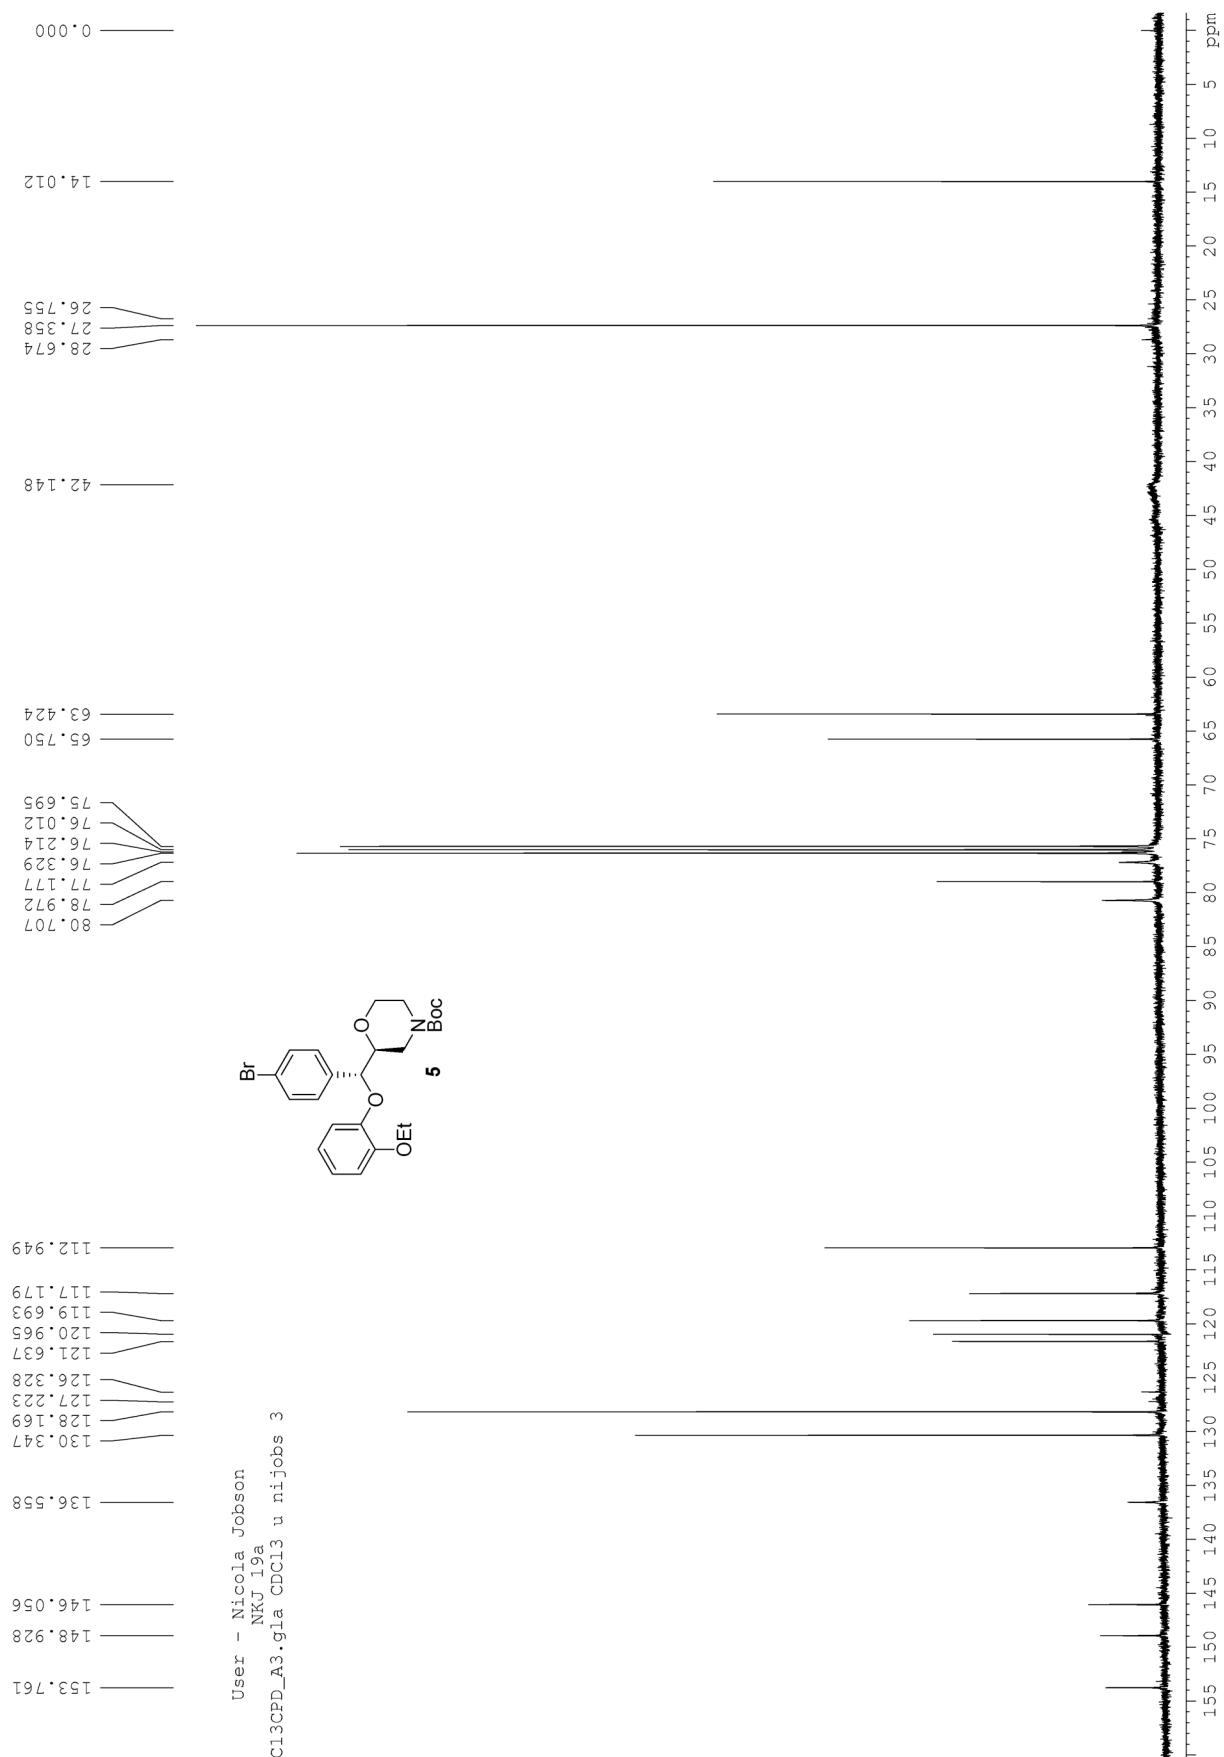

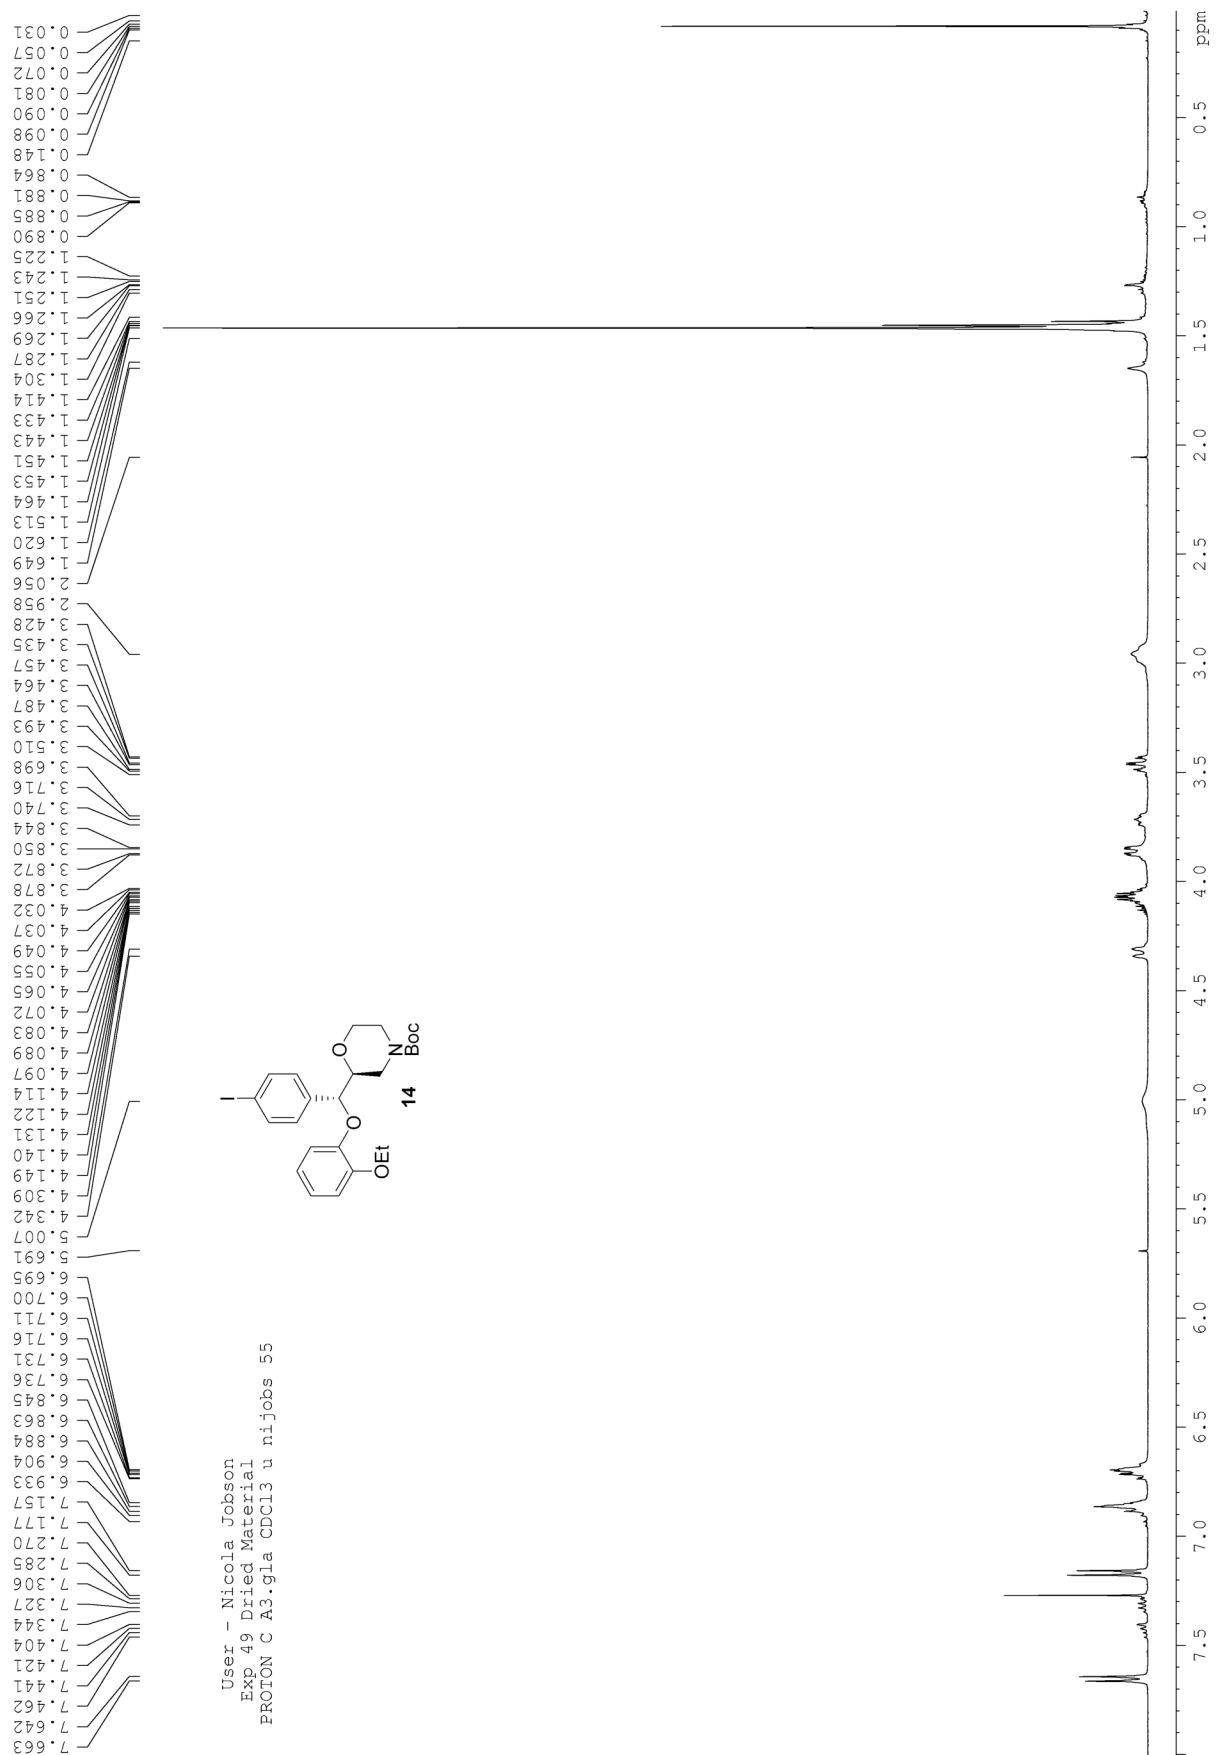

User - Nicola Jobson  
Exp 49 Dried Material  
PROTON C A3.gla CDCl3 u nijobs 55

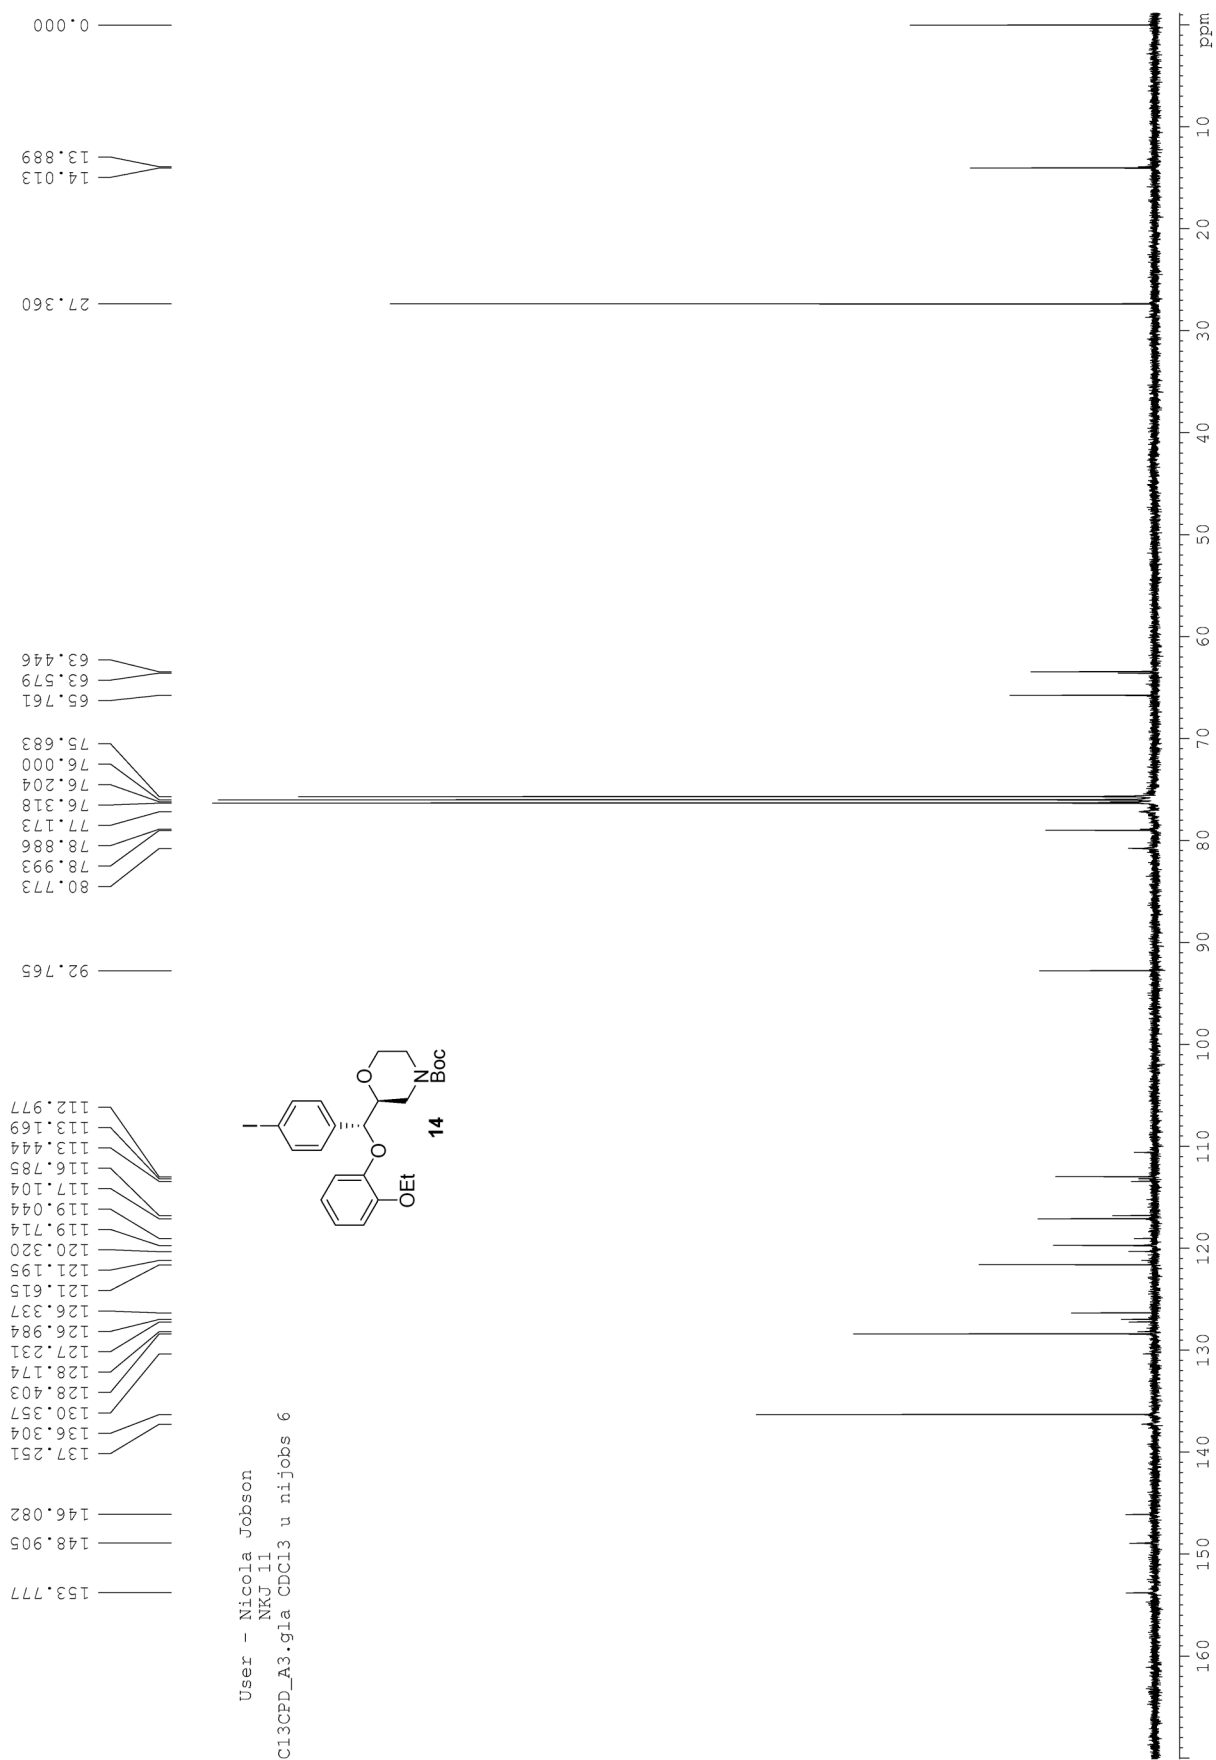

User - Nicola Jobson  
NKJ 11  
C13CPD\_A3.gla CDCl3 u nijobs 6

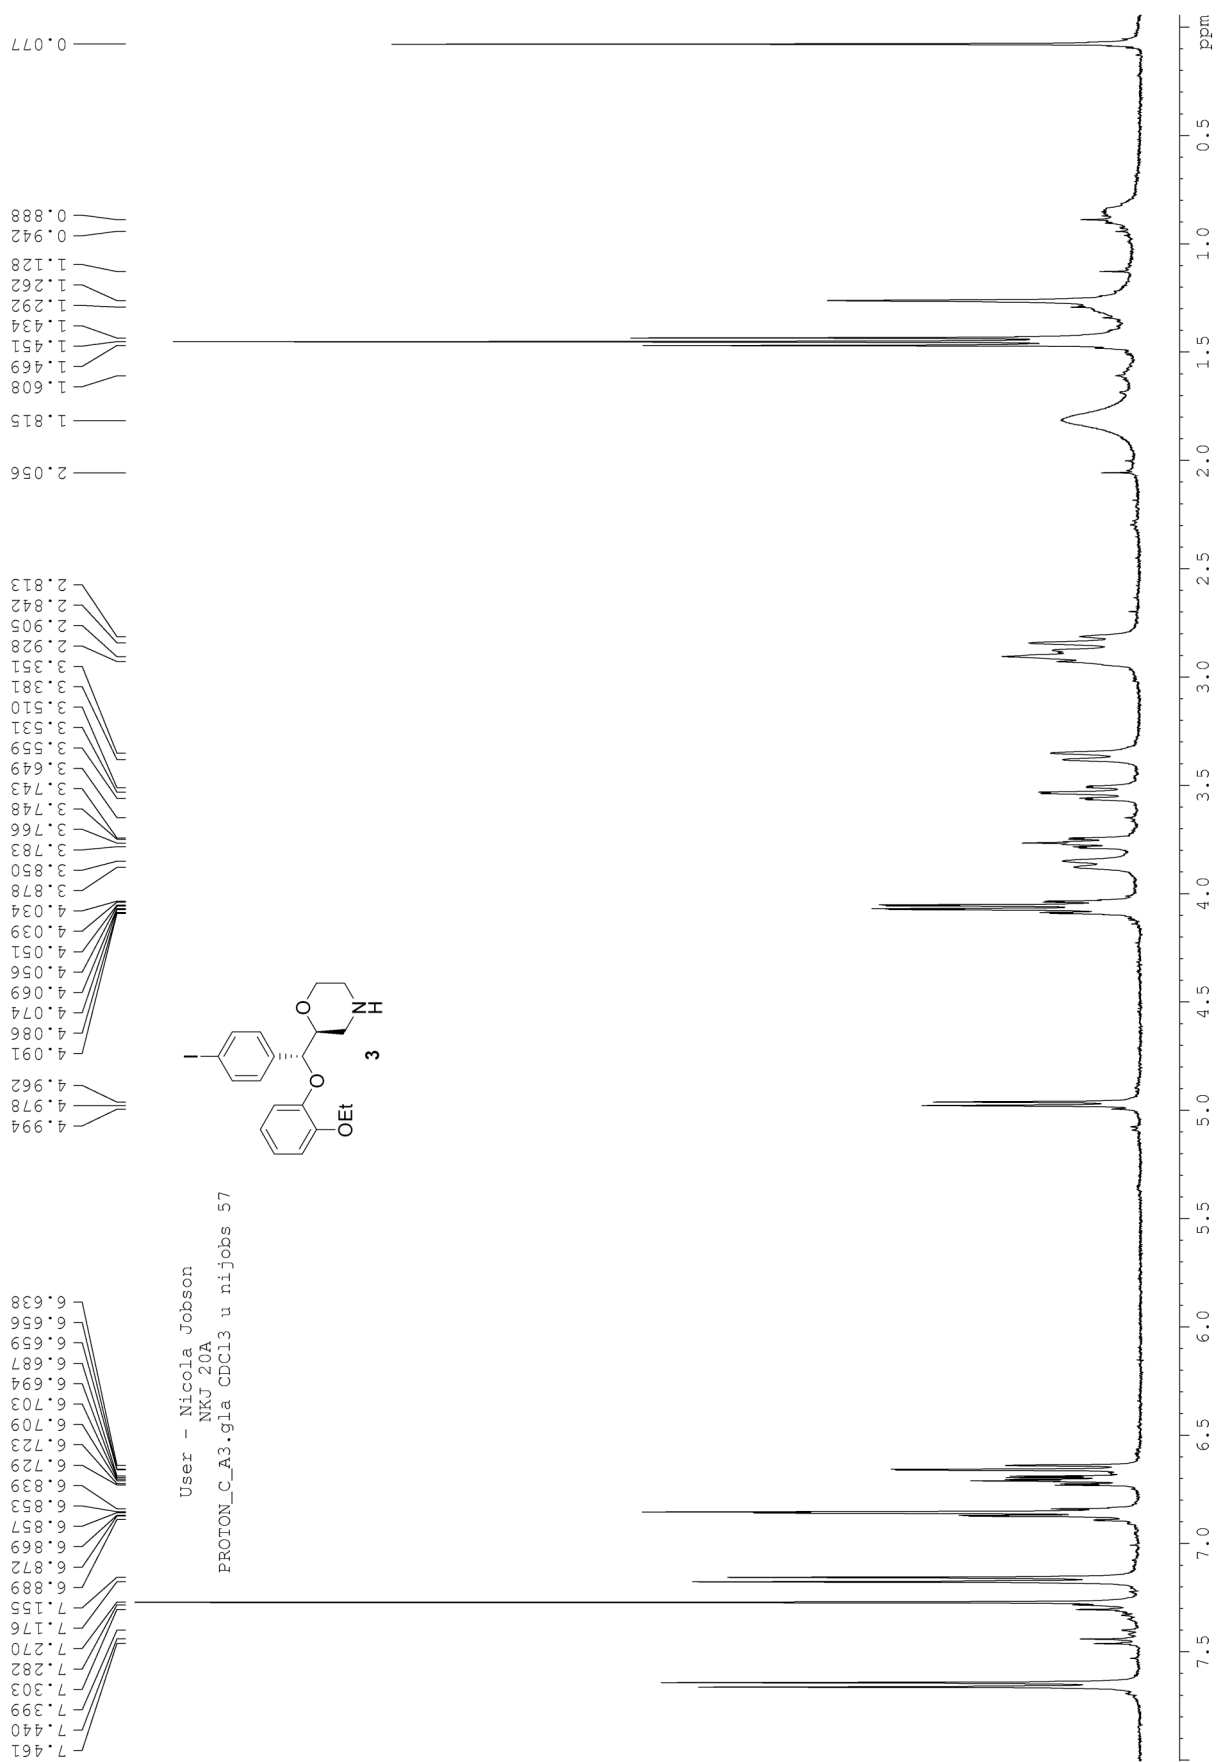

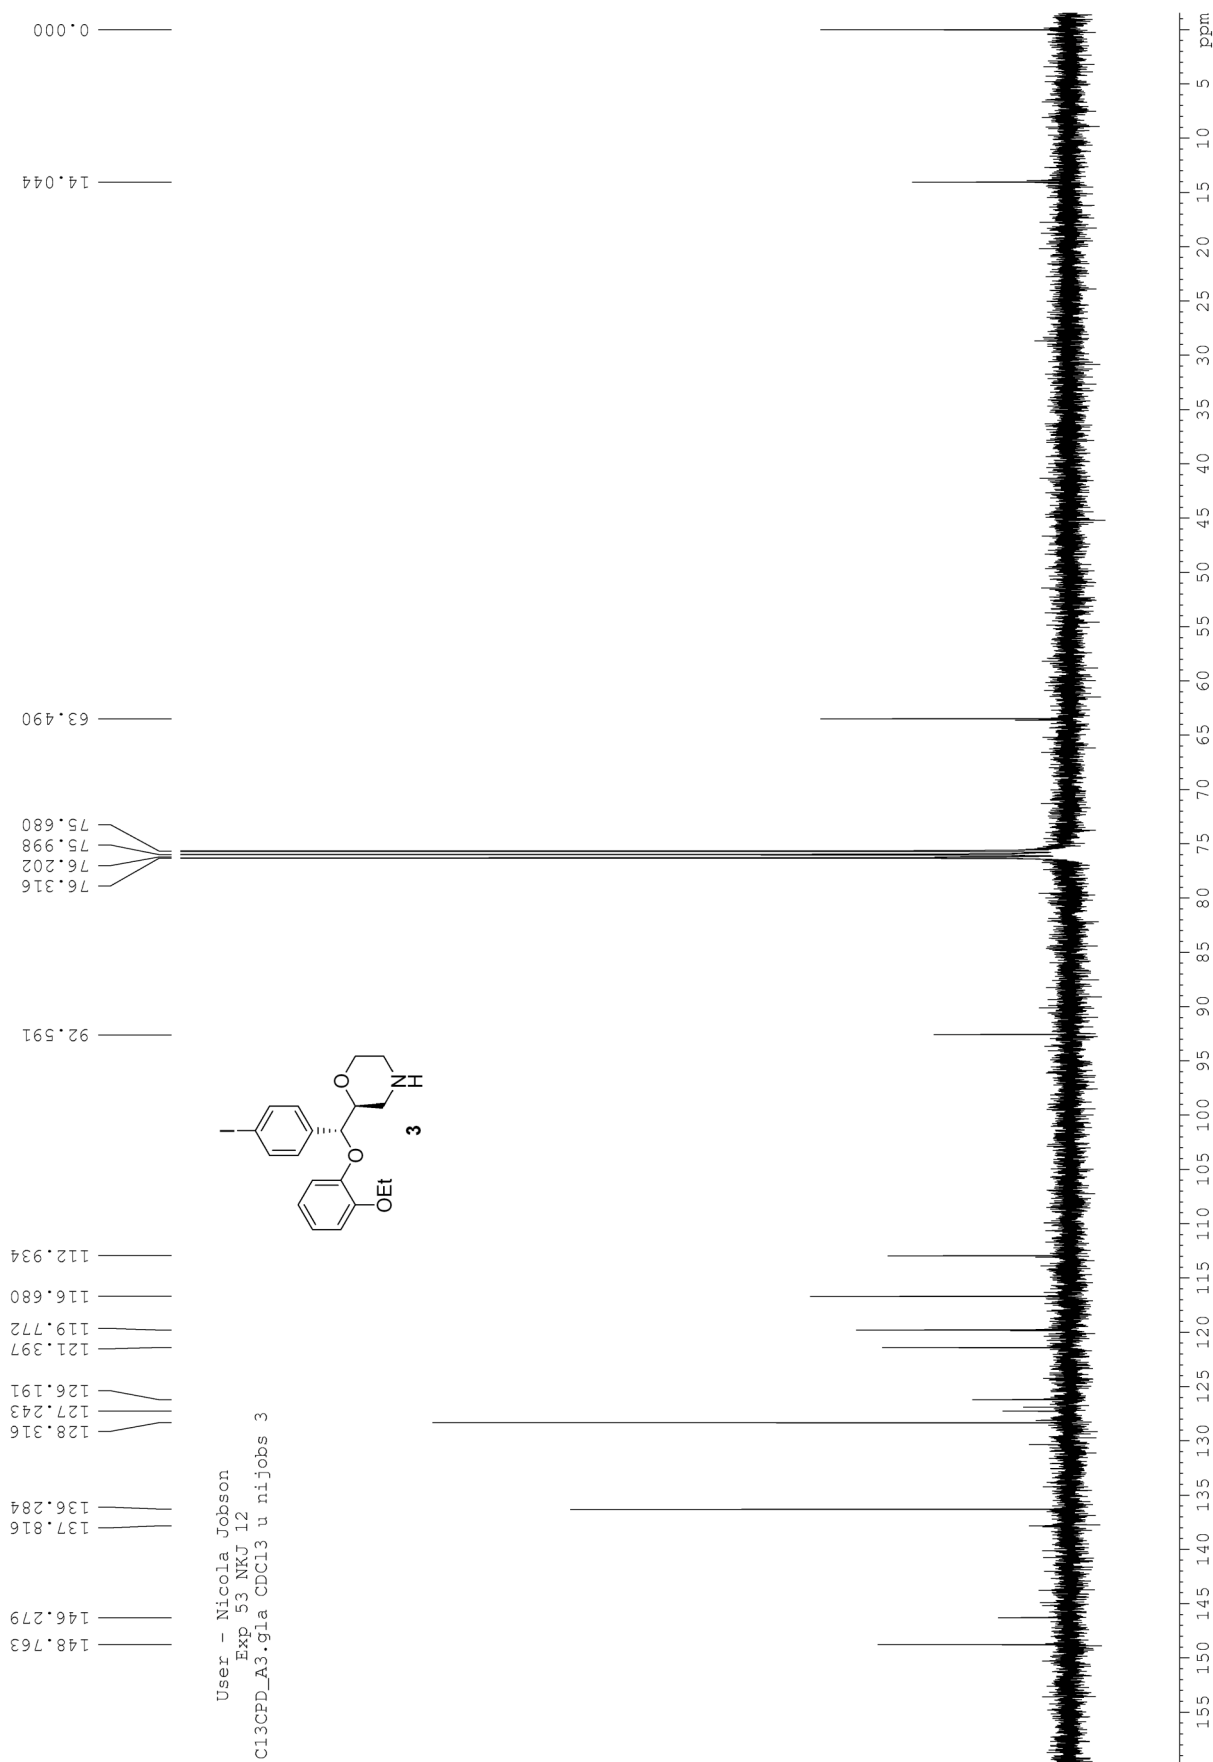

Supplement: b802819b.pdf [file b802819b.pdf]
